# Supplementary material for: Development of a stock–recruit model for simulating stock dynamics for uncertain situations: the example of Northeast Atlantic mackerel (Scomber scombrus)
Source: Oxford University Press journal article supplement (doi:10.1093/icesjms/fsr014), 2011-04-12
Supplement: fsr014supp.doc [file fsr014supp.doc]

**Supplementary material: ICES Journal of Marine Science, 68**

**Development of a stock–recruit model for simulating stock dynamics for uncertain situations; the example of Northeast Atlantic mackerel (*Scomber scombrus*)**

E. John Simmonds, Andrew Campbell, Dankert Skagen, Beatriz A. Roel, and Ciaran Kelly

**Uncertainty in spawning-stock biomass prior to 1980**

Values of spawning-stock biomass (SSB) before 1980 are uncertain because of the more-limited catch-at-age data for the period 1972–1979. They are only available with the plus group starting at age 4 in 1972, increasing annually to 1980 with that group at age 12 for 1980 and all subsequent years. There was no available information on recruitment or selection in the fishery for the age classes of 1960–1968 that contribute to the incrementing plus group. These recruits are not used in the *S–r* relationship as part of the recruitment time-series, so they have no additional uncertainty, but they do contribute to SSB in the years 1972–1979. In order to examine the sensitivity of the estimated SSB in those years to 1960–1968 recruitment, a range of values was simulated by bootstrapping from the catch-at-age data.

The procedure was as follows:

If *y* is a randomly selected year between 1980 and 1998, *L*1972+*j* is the catch in tonnes in the plus group in year 1972+*j*, and *Ly*+*j* is the catch in tonnes in the corresponding year and age range. Then, the *na*,1972+*j* catch at age *a* (*a* ≥ plus group) in year *y* is

*na*,1972+*j* = *na*,*y*+*j L*1972+*j* / *Ly*+*j*(for *j* = 0:7, and *a* = 4+*j* to *a* = 12+).

For each new catch matrix (catch at age and weight at age), an assessment using Integrated Catch Analysis in FLR (Fisheries Library in R), commonly referred to as a FLICA assessment, was carried out using the model settings and all other data from ICES (2009).

The mean *S* derived by this method is lower than the *S* from the assessment for the first four years (Table S1). This is due to the different equation being applied in the FLICA assessment for the plus group but not for other ages. From 1975 on, the results are indistinguishable from the ICES assessment. The value of the standard deviation (*σ*) is variable, but it declines to a negligible level by 1980; *S* and *σ* are included in the Bayesian analysis.

**Reference**

ICES. 2009. Report of the Working Group on Widely Distributed Stocks (WGWIDE). ICES Document CM 2009/ACOM: 12. 583 pp.

**Table S1**. Estimates of *S* and *σ* attributable to uncertainty at age in the early years of the assessment, where ages are collected into a plus group from age 4 in 1972 to age 12 in 1980. This has minimal influence on the results of the analysis.

| **Parameter** | **1972** | **1973** | **1974** | **1975** | **1976** | **1977** | **1978** | **1979** | **1980** |
| --- | --- | --- | --- | --- | --- | --- | --- | --- | --- |
| *S* (assess) | 3.91 | 3.97 | 3.79 | 3.52 | 3.19 | 3.02 | 2.98 | 2.52 | 2.11 |
| *S* | 3.23 | 3.61 | 3.55 | 3.45 | 3.20 | 3.02 | 2.98 | 2.52 | 2.11 |
| *σ* | 0.102 | 0.102 | 0.128 | 0.077 | 0.077 | 0.051 | 0.031 | 0.020 | 0.01 |

**Prior distribution of the means (*μ*), deviances [*τ* = (1/*σ*2)], and truncation to exclude zero values for every parameter in each model fitted using WINBUGS, and initial values for three Markov Chain Monte Carlo runs used to check for model convergence**

| ***S–r* model** | | | **Prior for model parameters** | | | | **Initial values for three chains** | | |
| --- | --- | --- | --- | --- | --- | --- | --- | --- | --- |
| **Type*** | **Parameter** | **pdf†** | **Distribution** | ***μ*** | ***τ*** | **Truncation** | **Initial 1** | **Initial 2** | **Initial 3** |
| B–H | *a* | G | Normal | 2 | 0.001 | 0.01 | 1 | 2 | 0.5 |
| B–H | *b* | G | Normal | 0.5 | 0.001 | 0.01 | 3 | 6 | 1.5 |
| B–H | *a* | L | Normal | 2 | 0.001 | 0.01 | 1 | 2 | 0.5 |
| B–H | *b* | L | Normal | 0.5 | 0.001 | 0.01 | 3 | 6 | 1.5 |
| B–H | *a* | N | Normal | 2 | 0.001 | 0.01 | 1 | 2 | 0.5 |
| B–H | *b* | N | Normal | 0.5 | 0.001 | 0.01 | 3 | 6 | 1.5 |
| HS | *a* | G | Normal | 2 | 0.001 | 0.01 | 1 | 2 | 0.5 |
| HS | *b* | G | Normal | 5 | 0.001 | min(SSB.obs) | 3 | 6 | 1.5 |
| HS | *a* | L | Normal | 2 | 0.001 | 0.01 | 1 | 2 | 0.5 |
| HS | *b* | L | Normal | 5 | 0.001 | min(SSB.obs) | 3 | 6 | 1.5 |
| HS | *a* | N | Normal | 2 | 0.001 | 0.01 | 1 | 2 | 0.5 |
| HS | *b* | N | Normal | 5 | 0.001 | min(SSB.obs) | 3 | 6 | 1.5 |
| P | *a* | G | Normal | 0.5 | 0.001 | 0.01 | 1 | 2 | 0.5 |
| P | *b* | G | Normal | 5 | 0.001 | 0.01 | 3 | 6 | 1.5 |
| P | *a* | L | Normal | 0.5 | 0.001 | 0.01 | 1 | 2 | 0.5 |
| P | *b* | L | Normal | 5 | 0.001 | 0.01 | 3 | 6 | 1.5 |
| P | *a* | N | Normal | 0.5 | 0.001 | 0.01 | 1 | 2 | 0.5 |
| P | *b* | N | Normal | 5 | 0.001 | 0.01 | 3 | 6 | 1.5 |
| Rk | *a* | G | Normal | 2 | 0.001 | 0.01 | 1 | 2 | 0.5 |
| Rk | *b* | G | Normal | 5 | 0.001 | 0.01 | 3 | 6 | 1.5 |
| Rk | *a* | L | Normal | 2 | 0.001 | 0.01 | 1 | 2 | 0.5 |
| Rk | *b* | L | Normal | 5 | 0.001 | 0.01 | 3 | 6 | 1.5 |
| Rk | *a* | N | Normal | 2 | 0.001 | 0.01 | 1 | 2 | 0.5 |
| Rk | *b* | N | Normal | 5 | 0.001 | 0.01 | 3 | 6 | 1.5 |
| SB–H | *a* | G | Normal | 2 000 | 1.00E–12 | 0.01 | 1 | 2 | 0.5 |
| SB–H | *b* | G | Normal | 500 | 1.00E–12 | 0.01 | 3 | 6 | 1.5 |
| SB–H | *g* | G | Normal | 0.5 | 0.001 | 0.01 | 0.5 | 1 | 0.25 |
| SB–H | *a* | L | Normal | 2 000 | 1.00E–12 | 0.01 | 1 | 2 | 0.5 |
| SB–H | *b* | L | Normal | 500 | 1.00E–12 | 0.01 | 3 | 6 | 1.5 |
| SB–H | *g* | L | Normal | 0.5 | 0.001 | 0.01 | 0.5 | 1 | 0.25 |
| SB–H | *a* | N | Normal | 2 000 | 1.00E–12 | 0.01 | 1 | 2 | 0.5 |
| SB–H | *b* | N | Normal | 500 | 1.00E–12 | 0.01 | 3 | 6 | 1.5 |
| SB–H | *g* | N | Normal | 0.5 | 0.001 | 0.01 | 0.5 | 1 | 0.25 |
|  |  |  |  | ***S*** | ***k*** |  |  |  |  |
| B–H | *k* | G | Gamma | 0.001 | 0.001 |  | 1 | 4 | 0.25 |
| B–H | *τ* | L | Gamma | 0.001 | 0.001 |  | 1 | 4 | 0.25 |
| B–H | *τ* | N | Gamma | 0.001 | 0.001 |  | 1 | 4 | 0.25 |
| HS | *k* | G | Gamma | 0.001 | 0.001 |  | 1 | 4 | 0.25 |
| HS | *τ* | L | Gamma | 0.001 | 0.001 |  | 1 | 4 | 0.25 |
| HS | *τ* | N | Gamma | 0.001 | 0.001 |  | 1 | 4 | 0.25 |
| P | *k* | G | Gamma | 0.001 | 0.001 |  | 1 | 4 | 0.25 |
| P | *τ* | L | Gamma | 0.001 | 0.001 |  | 1 | 4 | 0.25 |
| P | *τ* | N | Gamma | 0.001 | 0.001 |  | 1 | 4 | 0.25 |
| Rk | *k* | G | Gamma | 0.001 | 0.001 |  | 1 | 4 | 0.25 |
| Rk | *τ* | L | Gamma | 0.001 | 0.001 |  | 1 | 4 | 0.25 |
| Rk | *τ* | N | Gamma | 0.001 | 0.001 |  | 1 | 4 | 0.25 |
| SB–H | *k* | G | Gamma | 0.001 | 0.001 |  | 1 | 4 | 0.25 |
| SB–H | *τ* | L | Gamma | 0.001 | 0.001 |  | 1 | 4 | 0.25 |
| SB–H | *τ* | N | Gamma | 0.001 | 0.001 |  | 1 | 4 | 0.25 |

* See abbreviations defined in the main text, Table 1.

† G, gamma; L, lognormal; N, normal.
